# Supplementary material
Source: Research Square preprint supplement (doi:10.21203/rs.3.rs-8967310/v1)
Supplement: Supplementary file 1 [file 6c007a53a5ff434cec0f4d44.docx]

**Survey Questions**

**Preliminary Questions**

Age

Sex

Condition (list)

**Part 1: Chronic Pain and Quality of Life**

**Q.1 In the last 6 months, have you experienced physical pain that lasted for at least 3 months?**

1. Yes
2. No

If yes:

**Q.2 Do you have a specific treatment for this pain?**

1. No, no specific treatment
2. Yes, a treatment **first** prescribed by my general practitioner
3. Yes, a treatment **first** prescribed by a specialist in pain therapy
4. Yes, a treatment **first** prescribed by another specialist

**Q. 3 On a scale from 0 (no pain) to 10 (unbearable pain), what was your average pain level over the past week?**

0 1 2 3 4 5 6 7 8 9 10

**Q. 4 How much does your pain affect the following activities?**

- My usual study or work activities
- My ability to take care of myself (personal hygiene, etc.)
- My ability to carry out normal household tasks (cleaning, cooking, etc.)
- My ability to care for others (children, parents, etc.)
- My leisure activities
- My relationships with friends and acquaintances
- My sleep regularity

1. *It is an activity that I do not normally do.*
2. *It has not affected it at all*
3. *It has partially limited me*
4. *It has significantly limited me*
5. *It has prevented me from doing this activity*

**Q. 5 Who is currently your primary point of contact for managing your pain?**

- General practitioner
- Condition specialist
- Pain therapist
- Physiotherapist
- Pharmacist
- Acupuncturists / Pranic Healing Practitioners and other practitioners of alternative medicine
- Other
- No one

**Q. 6 How much do you agree or disagree with the following statements?**

- I believe my general practitioner has all the necessary skills to effectively manage my chronic pain problems
- My general practitioner dedicates enough time to discussing my chronic pain when I need it
- I believe the condition specialist has all the necessary skills to effectively manage my chronic pain problems
- My condition specialist dedicates enough time to discussing my chronic pain when I need it
- Communication between my general practitioner and the specialists who treat my chronic pain is effective
- There is good collaboration between my general practitioner and the specialists who manage my chronic pain
- I have received clear and complete guidance from my doctors on how to manage acute pain episodes
- My general practitioner treats my chronic pain as a secondary concern
- The primary condition specialist treats my chronic pain as a secondary concern

1. *Strongly agree*
2. *Agree*
3. *Disagree*
4. *Strongly disagree*

**Part 2:** **Knowledge of Law 38/2010**

**Q. 7 Are you aware of Law 38 of 2010, which guarantees access to palliative care and pain therapy?**

1. Yes, I am well acquainted with it
2. I only have a general idea of it
3. I had never heard of it

**Q. 8 Are you aware of the difference between palliative care and pain therapy?**

1. Yes, I know it well
2. Yes, fairly well
3. No, I don't know the difference

**Q. 9 Based on your knowledge and/or personal experience, how easy is it in Italy to access opioid- and cannabinoid-based pharmacological therapies for people suffering from chronic pain?**

1. Very easy
2. Fairly easy
3. Neither easy nor difficult
4. Fairly difficult
5. Very difficult

**Q. 10 *(For those who find it fairly difficult/difficult to access opioid- and cannabinoid-based therapies)* Why do you think it is difficult in Italy to access opioid- and cannabinoid-based therapies? *(Multiple answers possible*)**

1. These medications are hard to find
2. Doctors are often reluctant to prescribe this type of medication
3. These therapies are still not well-known among healthcare professionals
4. Many patients are reluctant to use this type of therapy
5. Italian laws do not facilitate access to these therapies
6. Other (please specify)

**Q. 11 Based on your knowledge and/or personal experience, how easy is it in Italy to access invasive and minimally invasive therapies for people suffering from chronic pain?**

1. Very easy
2. Fairly easy
3. Neither easy nor difficult
4. Fairly difficult
5. Very difficult

**Q. 12 *(For those who find it fairly difficult/difficult to access invasive and minimally invasive therapies)* Why do you think it is difficult in Italy to access invasive and minimally invasive therapies? *(Multiple answers possible)***

1. There are few doctors capable of performing them
2. They are only carried out at centers of excellence
3. Waiting lists are long
4. These are costly therapies, and doctors are reluctant to prescribe them
5. Other (please specify)

**Part 3: Needs and Expectations of People Living with Chronic Pain**

**Q. 13 In managing your chronic pain, have you ever had difficulty with:**

- Finding a competent specialist to take charge of your care
- Accessing the medications prescribed to you for pain management
- Accessing information on medications, exemptions, therapy access, referral centers, etc.
- Being able to afford the medications you need

1. Never had any difficulty
2. I sometimes had difficulty in the past
3. I sometimes encounter difficulty
4. I often have difficulty

**Q. 14 What types of information do you feel you need most? *(Multiple answers possible*)**

1. Available medications, their use, and possible side effects
2. How to access exemptions
3. Specialist doctors or facilities to turn to for pain treatment
4. Available non-pharmacological therapies
5. Lifestyle tips helpful in reducing/managing chronic pain
6. Psychological support
7. Other information (please specify)

**Q. 15 How much do you agree or disagree with the following statements?**

- In Italy, people suffering from chronic pain receive adequate care from the national health system
- In Italy, the media pays great attention to people with chronic pain
- Political and health institutions are attentive to the needs of people with chronic pain
- The healthcare system adequately recognizes chronic pain as a condition in its own right, and not merely as a symptom of other diseases
- Current national regulations on opioid and cannabinoid medications do not represent an obstacle to the use of these therapies for combating chronic pain

1. *Strongly agree*
2. *Agree*
3. *Disagree*
4. *Strongly disagree*
5. *I don't know*

**Q. 16 Have you ever encountered bureaucratic or administrative difficulties in obtaining prescriptions for opioid- or cannabinoid-based medications?**

1. *Very often*
2. *Often*
3. *Fairly often*
4. *Sometimes*
5. *Rarely*
6. *Never*

**Q. 17 In your opinion, at a social and media level, is chronic pain a topic that is…?**

- At a social level
- At a media level

1. Very widely covered
2. Fairly widely covered
3. Rarely covered
4. Not covered at all
5. I don't know

**Q. 18 Based on your experience, how well-informed would you say the following professionals are regarding the use of cannabinoids for therapeutic purposes?**

- General practitioners
- Specialist doctors
- Pharmacists

1. Very well informed
2. Fairly well informed
3. Poorly informed
4. Not at all informed
5. I don't know

**Q. 19 If you wish, you may leave a suggestion addressed to political and health institutions to improve policies on pain management.** *(Open answer)*
