# Supplementary material
Source: Research Square preprint supplement (doi:10.21203/rs.3.rs-8967310/v1)
Supplement: Supplementary file 2 [file d95c62a72dbdc3c1c416a277.docx]

**Table S1. Information on pain intensity in the whole population of respondents (N=492).**

| **Characteristic** | **Mean Pain Intensity, Mean ± Standard Deviation** | **No Specific Therapy, n (%)** |
| --- | --- | --- |
| Overall | 6.3±1.8 | 138 (28.0%) |
| Age group |  |  |
| - <49 years | 6.4±1.8 | 21 (28.4%) |
| - 50–59 years | 6.2±1.7 | 37 (27.8%) |
| - 60–69 years | 6.2±1.9 | 50 (32.9%) |
| - 70–85 years | 6.2±1.8 | 30 (22.6%) |
| - Geographic area |  |  |
| - Northwest Italy | 6.0±1.6 | 40 (31.3%) |
| - Northeast Italy | 5.8±1.5 | 32 (29.6%) |
| - Central Italy | 6.4±1.7 | 28 (28.6%) |
| - South and Islands | 6.6±1.9 | 38 (24.1%) |
